# Supplementary material for: Decarboxylation Study of Acidic Cannabinoids: A Novel Approach Using Ultra-High-Performance Supercritical Fluid Chromatography/Photodiode Array-Mass Spectrometry
Source: PubMed Central journal article supplement (PMC5549281; doi:10.1089/can.2016.0020), 2016-12-01

# Supplementary Data

**Supplementary Table S1. Decarboxylation Studies Over a Range of Temperature and Time**

| Time (min) | CBD (mM) | CBDA (mM) | $\Delta^9$ -THC (mM) | THCA-A (mM) | CBG (mM) | CBGA (mM) |
|------------|----------|-----------|----------------------|-------------|----------|-----------|
| 80°C       |          |           |                      |             |          |           |
| 0          | 0.153    | 0.833     | 0.284                | 0.421       | 0.016    | 0.088     |
| 6          | 0.165    | 0.818     | 0.279                | 0.299       | 0.016    | 0.076     |
| 12         | 0.200    | 0.828     | 0.356                | 0.370       | 0.017    | 0.079     |
| 18         | 0.233    | 0.744     | 0.386                | 0.268       | 0.016    | 0.079     |
| 24         | 0.242    | 0.744     | 0.424                | 0.257       | 0.016    | 0.079     |
| 30         | 0.222    | 0.807     | 0.390                | 0.313       | 0.016    | 0.082     |
| 36         | 0.243    | 0.779     | 0.427                | 0.279       | 0.017    | 0.077     |
| 42         | 0.250    | 0.716     | 0.444                | 0.237       | 0.018    | 0.071     |
| 48         | 0.224    | 0.770     | 0.406                | 0.280       | 0.018    | 0.079     |
| 54         | 0.249    | 0.723     | 0.448                | 0.226       | 0.016    | 0.076     |
| 60         | 0.261    | 0.709     | 0.453                | 0.223       | 0.018    | 0.074     |
| 95°C       |          |           |                      |             |          |           |
| 0          | 0.153    | 0.833     | 0.284                | 0.421       | 0.088    | 0.088     |
| 5          | 0.192    | 0.844     | 0.348                | 0.348       | 0.081    | 0.081     |
| 10         | 0.226    | 0.765     | 0.404                | 0.289       | 0.076    | 0.076     |
| 15         | 0.272    | 0.720     | 0.464                | 0.216       | 0.071    | 0.071     |
| 20         | 0.308    | 0.646     | 0.499                | 0.160       | 0.065    | 0.065     |
| 25         | 0.346    | 0.606     | 0.547                | 0.129       | 0.065    | 0.065     |
| 30         | 0.360    | 0.597     | 0.550                | 0.137       | 0.060    | 0.060     |
| 35         | 0.409    | 0.501     | 0.583                | 0.091       | 0.053    | 0.053     |
| 40         | 0.433    | 0.469     | 0.589                | 0.081       | 0.050    | 0.050     |
| 45         | 0.456    | 0.461     | 0.604                | 0.067       | 0.048    | 0.048     |
| 50         | 0.495    | 0.386     | 0.625                | 0.059       | 0.038    | 0.038     |
| 110°C      |          |           |                      |             |          |           |
| 0          | 0.153    | 0.833     | 0.284                | 0.421       | 0.016    | 0.088     |
| 3          | 0.194    | 0.823     | 0.345                | 0.373       | 0.019    | 0.080     |
| 6          | 0.255    | 0.728     | 0.436                | 0.268       | 0.024    | 0.071     |
| 9          | 0.329    | 0.607     | 0.508                | 0.169       | 0.027    | 0.063     |
| 12         | 0.404    | 0.491     | 0.565                | 0.104       | 0.029    | 0.047     |
| 15         | 0.456    | 0.404     | 0.585                | 0.073       | 0.031    | 0.035     |
| 20         | 0.526    | 0.305     | 0.621                | 0.053       | 0.034    | 0.025     |
| 25         | 0.615    | 0.226     | 0.640                | 0.021       | 0.035    | 0.020     |
| 30         | 0.649    | 0.174     | 0.637                | 0.018       | 0.038    | 0.013     |
| 35         | 0.671    | 0.143     | 0.638                | 0.017       | 0.042    | 0.003     |
| 40         | 0.699    | 0.107     | 0.640                | 0.014       | 0.041    | 0.001     |
| 45         | 0.695    | 0.078     | 0.638                | 0.011       | 0.040    | 0.001     |
| 50         | 0.724    | 0.084     | 0.639                | 0.010       | 0.042    | 0.001     |
| 130°C      |          |           |                      |             |          |           |
| 0          | 0.153    | 0.833     | 0.284                | 0.421       | 0.016    | 0.088     |
| 3          | 0.295    | 0.581     | 0.469                | 0.155       | 0.026    | 0.057     |
| 6          | 0.553    | 0.218     | 0.607                | 0.021       | 0.035    | 0.023     |
| 9          | 0.651    | 0.080     | 0.618                | 0.008       | 0.042    | 0.007     |
| 12         | 0.701    | 0.052     | 0.628                | 0.005       | 0.046    | 0.003     |
| 15         | 0.716    | 0.031     | 0.618                | 0.004       | 0.047    | 0.003     |
| 20         | 0.727    | 0.016     | 0.638                | 0.001       | 0.048    | 0.001     |
| 25         | 0.735    | 0.013     | 0.638                | 0.000       | 0.047    | 0.001     |
| 30         | 0.749    | 0.011     | 0.639                | 0.000       | 0.047    | 0.001     |
| 35         | 0.726    | 0.013     | 0.635                | 0.000       | 0.047    | 0.001     |
| 40         | 0.730    | 0.007     | 0.631                | 0.000       | 0.047    | 0.001     |
| 145°C      |          |           |                      |             |          |           |
| 0          | 0.153    | 0.833     | 0.284                | 0.421       | 0.016    | 0.088     |
| 3          | 0.553    | 0.179     | 0.564                | 0.020       | 0.034    | 0.018     |
| 6          | 0.714    | 0.049     | 0.620                | 0.007       | 0.046    | 0.002     |
| 9          | 0.744    | 0.017     | 0.641                | 0.005       | 0.052    | 0.001     |
| 12         | 0.746    | 0.010     | 0.614                | 0.001       | 0.052    | 0.001     |
| 15         | 0.752    | 0.006     | 0.630                | 0.001       | 0.051    | 0.001     |
| 20         | 0.748    | 0.005     | 0.632                | 0.001       | 0.050    | 0.001     |
| 25         | 0.727    | 0.001     | 0.630                | 0.001       | 0.047    | 0.001     |
| 30         | 0.714    | 0.006     | 0.622                | 0.001       | 0.046    | 0.001     |

CBD, cannabidiol; CBDA, cannabidiolic acid; CBG, cannabigerol; CBGA, cannabigerolic acid; THC, tetrahydrocannabinol; THCA-A, tetrahydrocannabinolic acid-A.

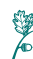

Supplement: Supp_Table1.pdf [file Supp_Table1.pdf]
